# Supplementary material for: Cryo-EM structure of the SAGA and NuA4 coactivator subunit Tra1 at 3.7 angstrom resolution
Source: eLife journal article supplement (doi:10.7554/elife.28384), 2017-08-02
Supplement: supp [file elife-28384-supp-v1.zip]

Archive with 9 entries (9 files):
- elife_poa_e28384_Figure_1_figure_supplement_4.png
- elife_poa_e28384_Figure_3_figure_supplement_1.png
- elife_poa_e28384_Figure_1_figure_supplement_1.png
- elife_poa_e28384_Figure_5_figure_supplement_5.png
- elife_poa_e28384_Figure_2_figure_supplement_1.png
- elife_poa_e28384_Video_1.mp4
- elife_poa_e28384_Figure_1_figure_supplement_3.png
- elife_poa_e28384_Figure_1_figure_supplement_2.png
- elife_poa_e28384_Transparent_Reporting_File.pdf
