# Supplementary figures and images for: Cryo-EM structure of the SAGA and NuA4 coactivator subunit Tra1 at 3.7 angstrom resolution
Source: eLife journal article supplement (doi:10.7554/elife.28384), 2017-08-02

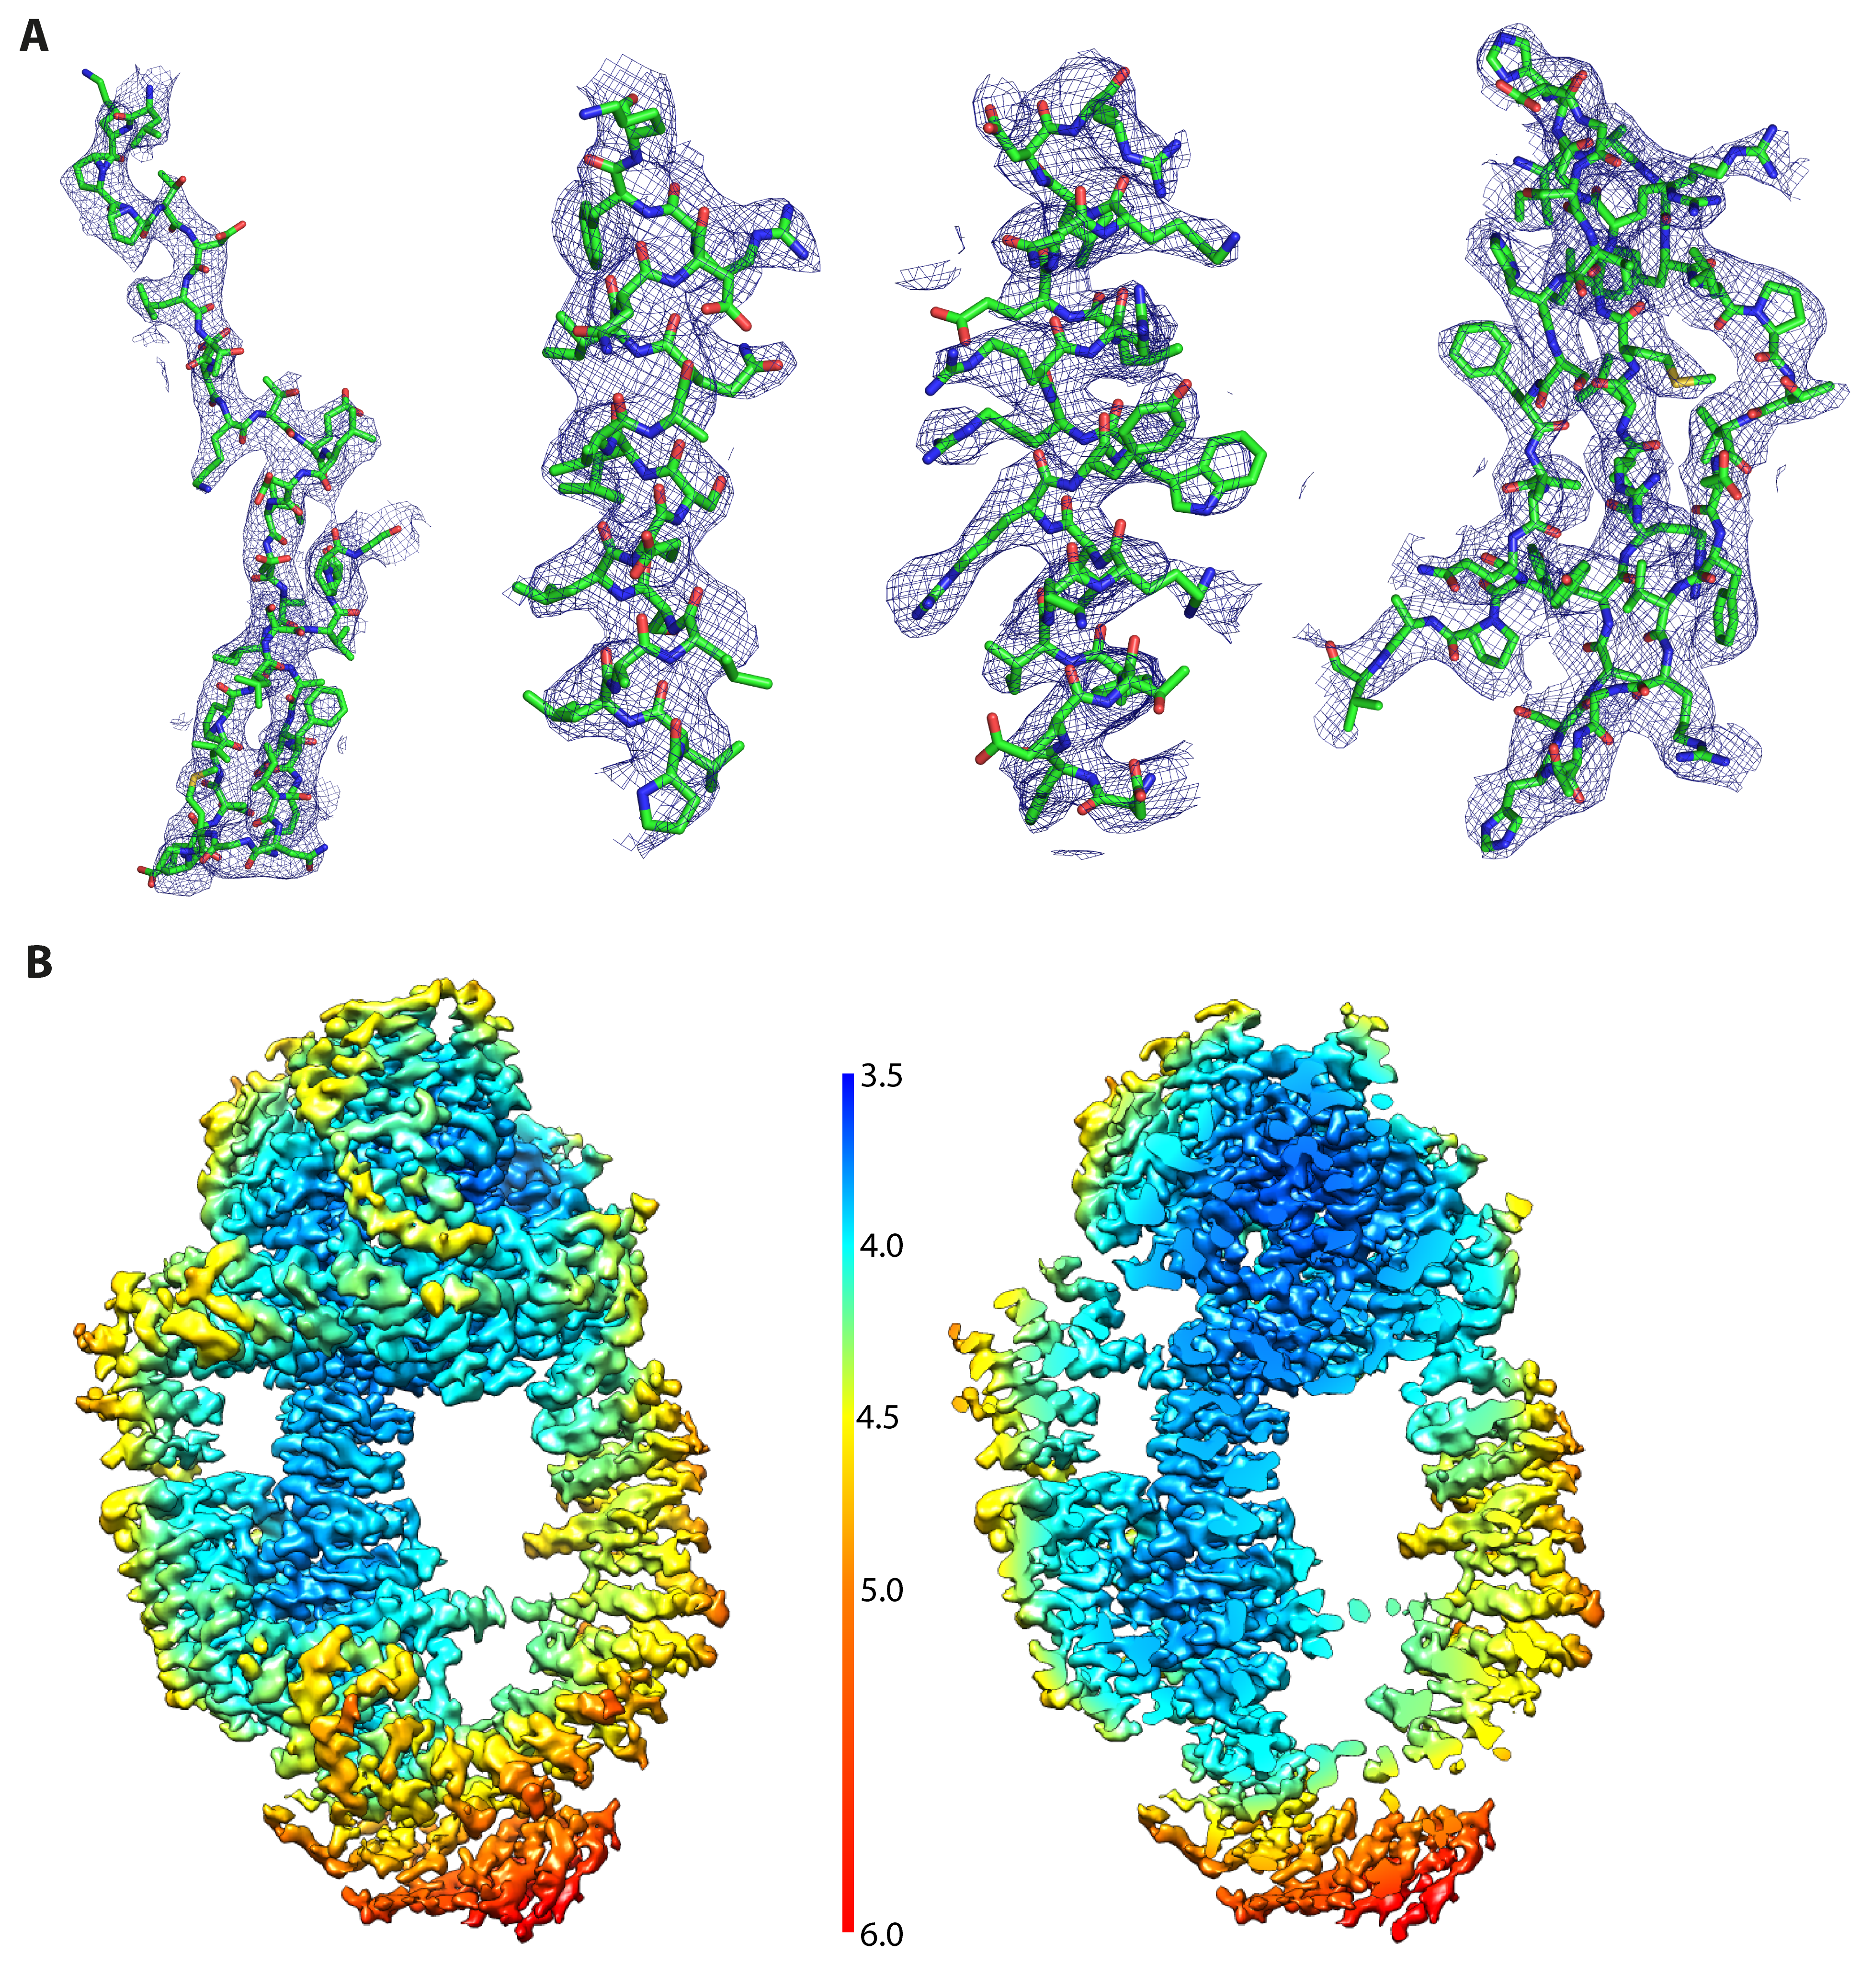

Supplement: supp [file elife-28384-supp-v1.zip › elife_poa_e28384_Figure_1_figure_supplement_4.png]

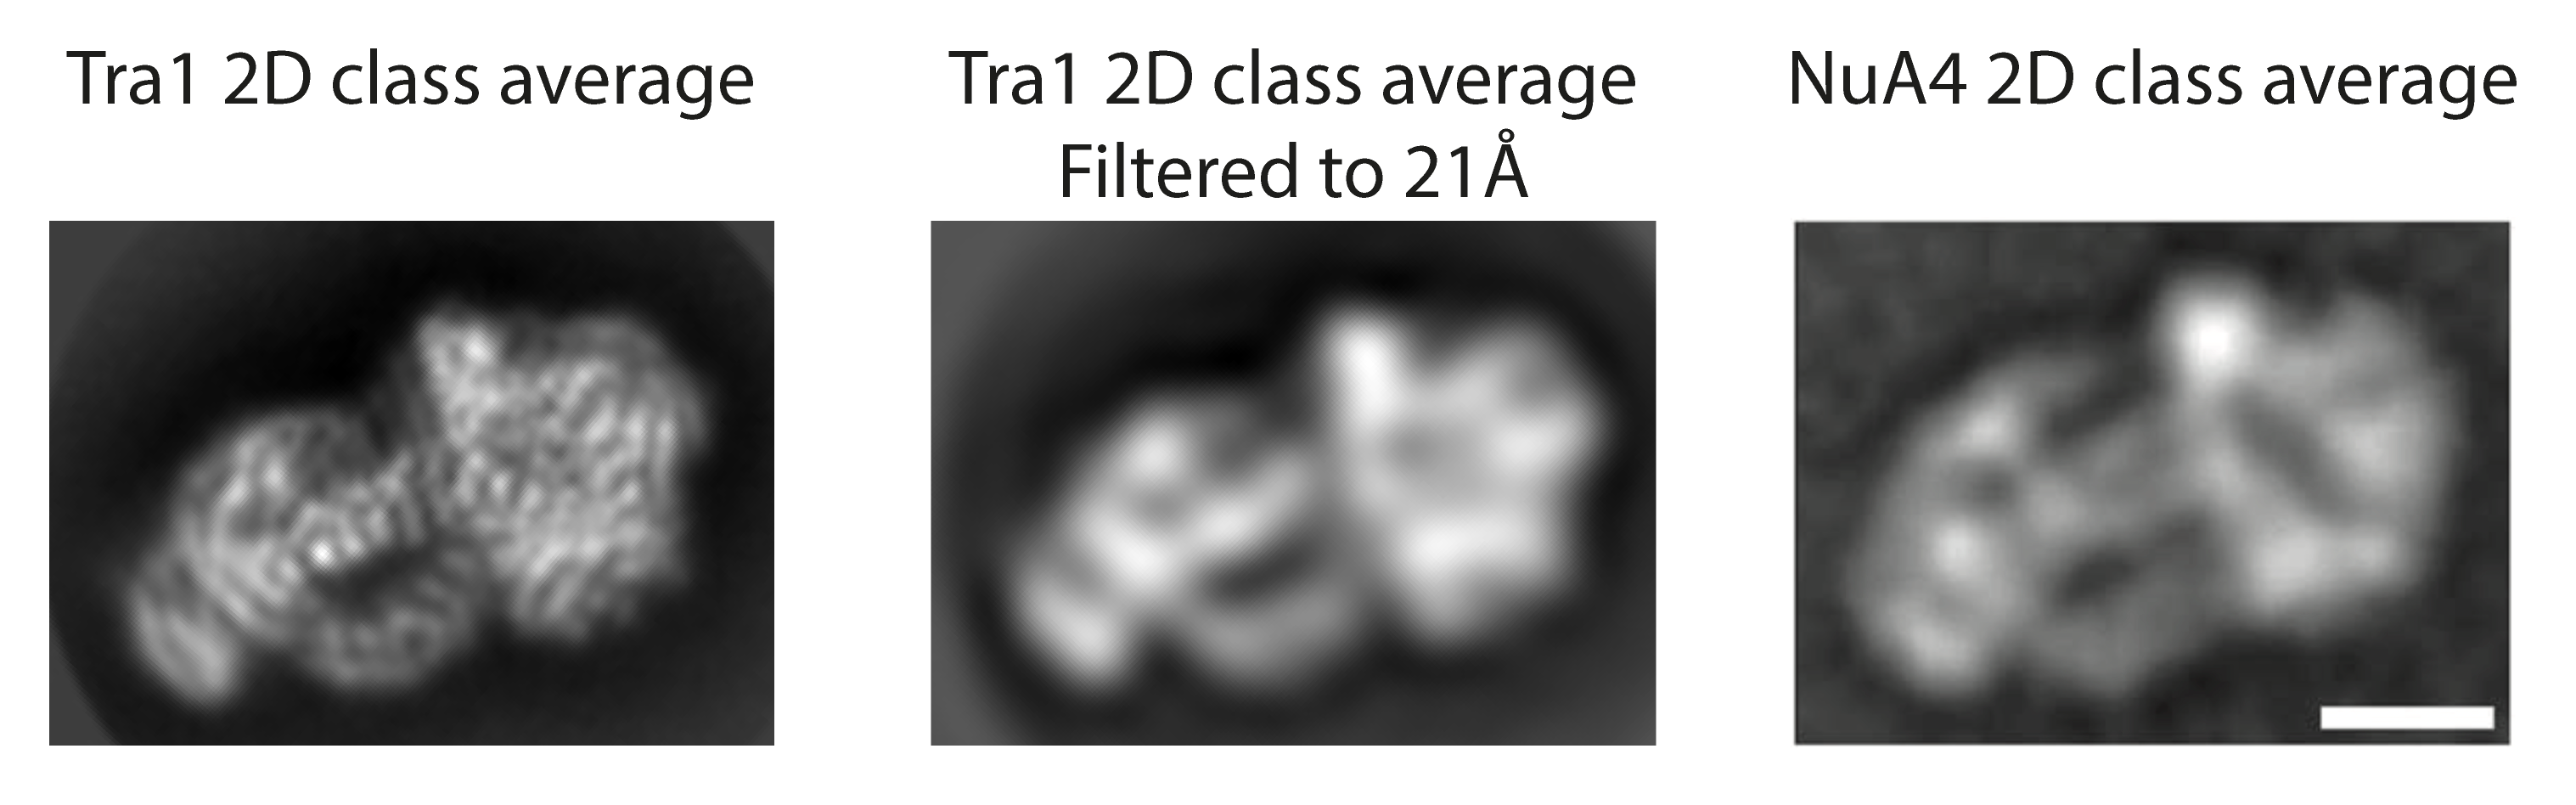

Supplement: supp [file elife-28384-supp-v1.zip › elife_poa_e28384_Figure_3_figure_supplement_1.png]

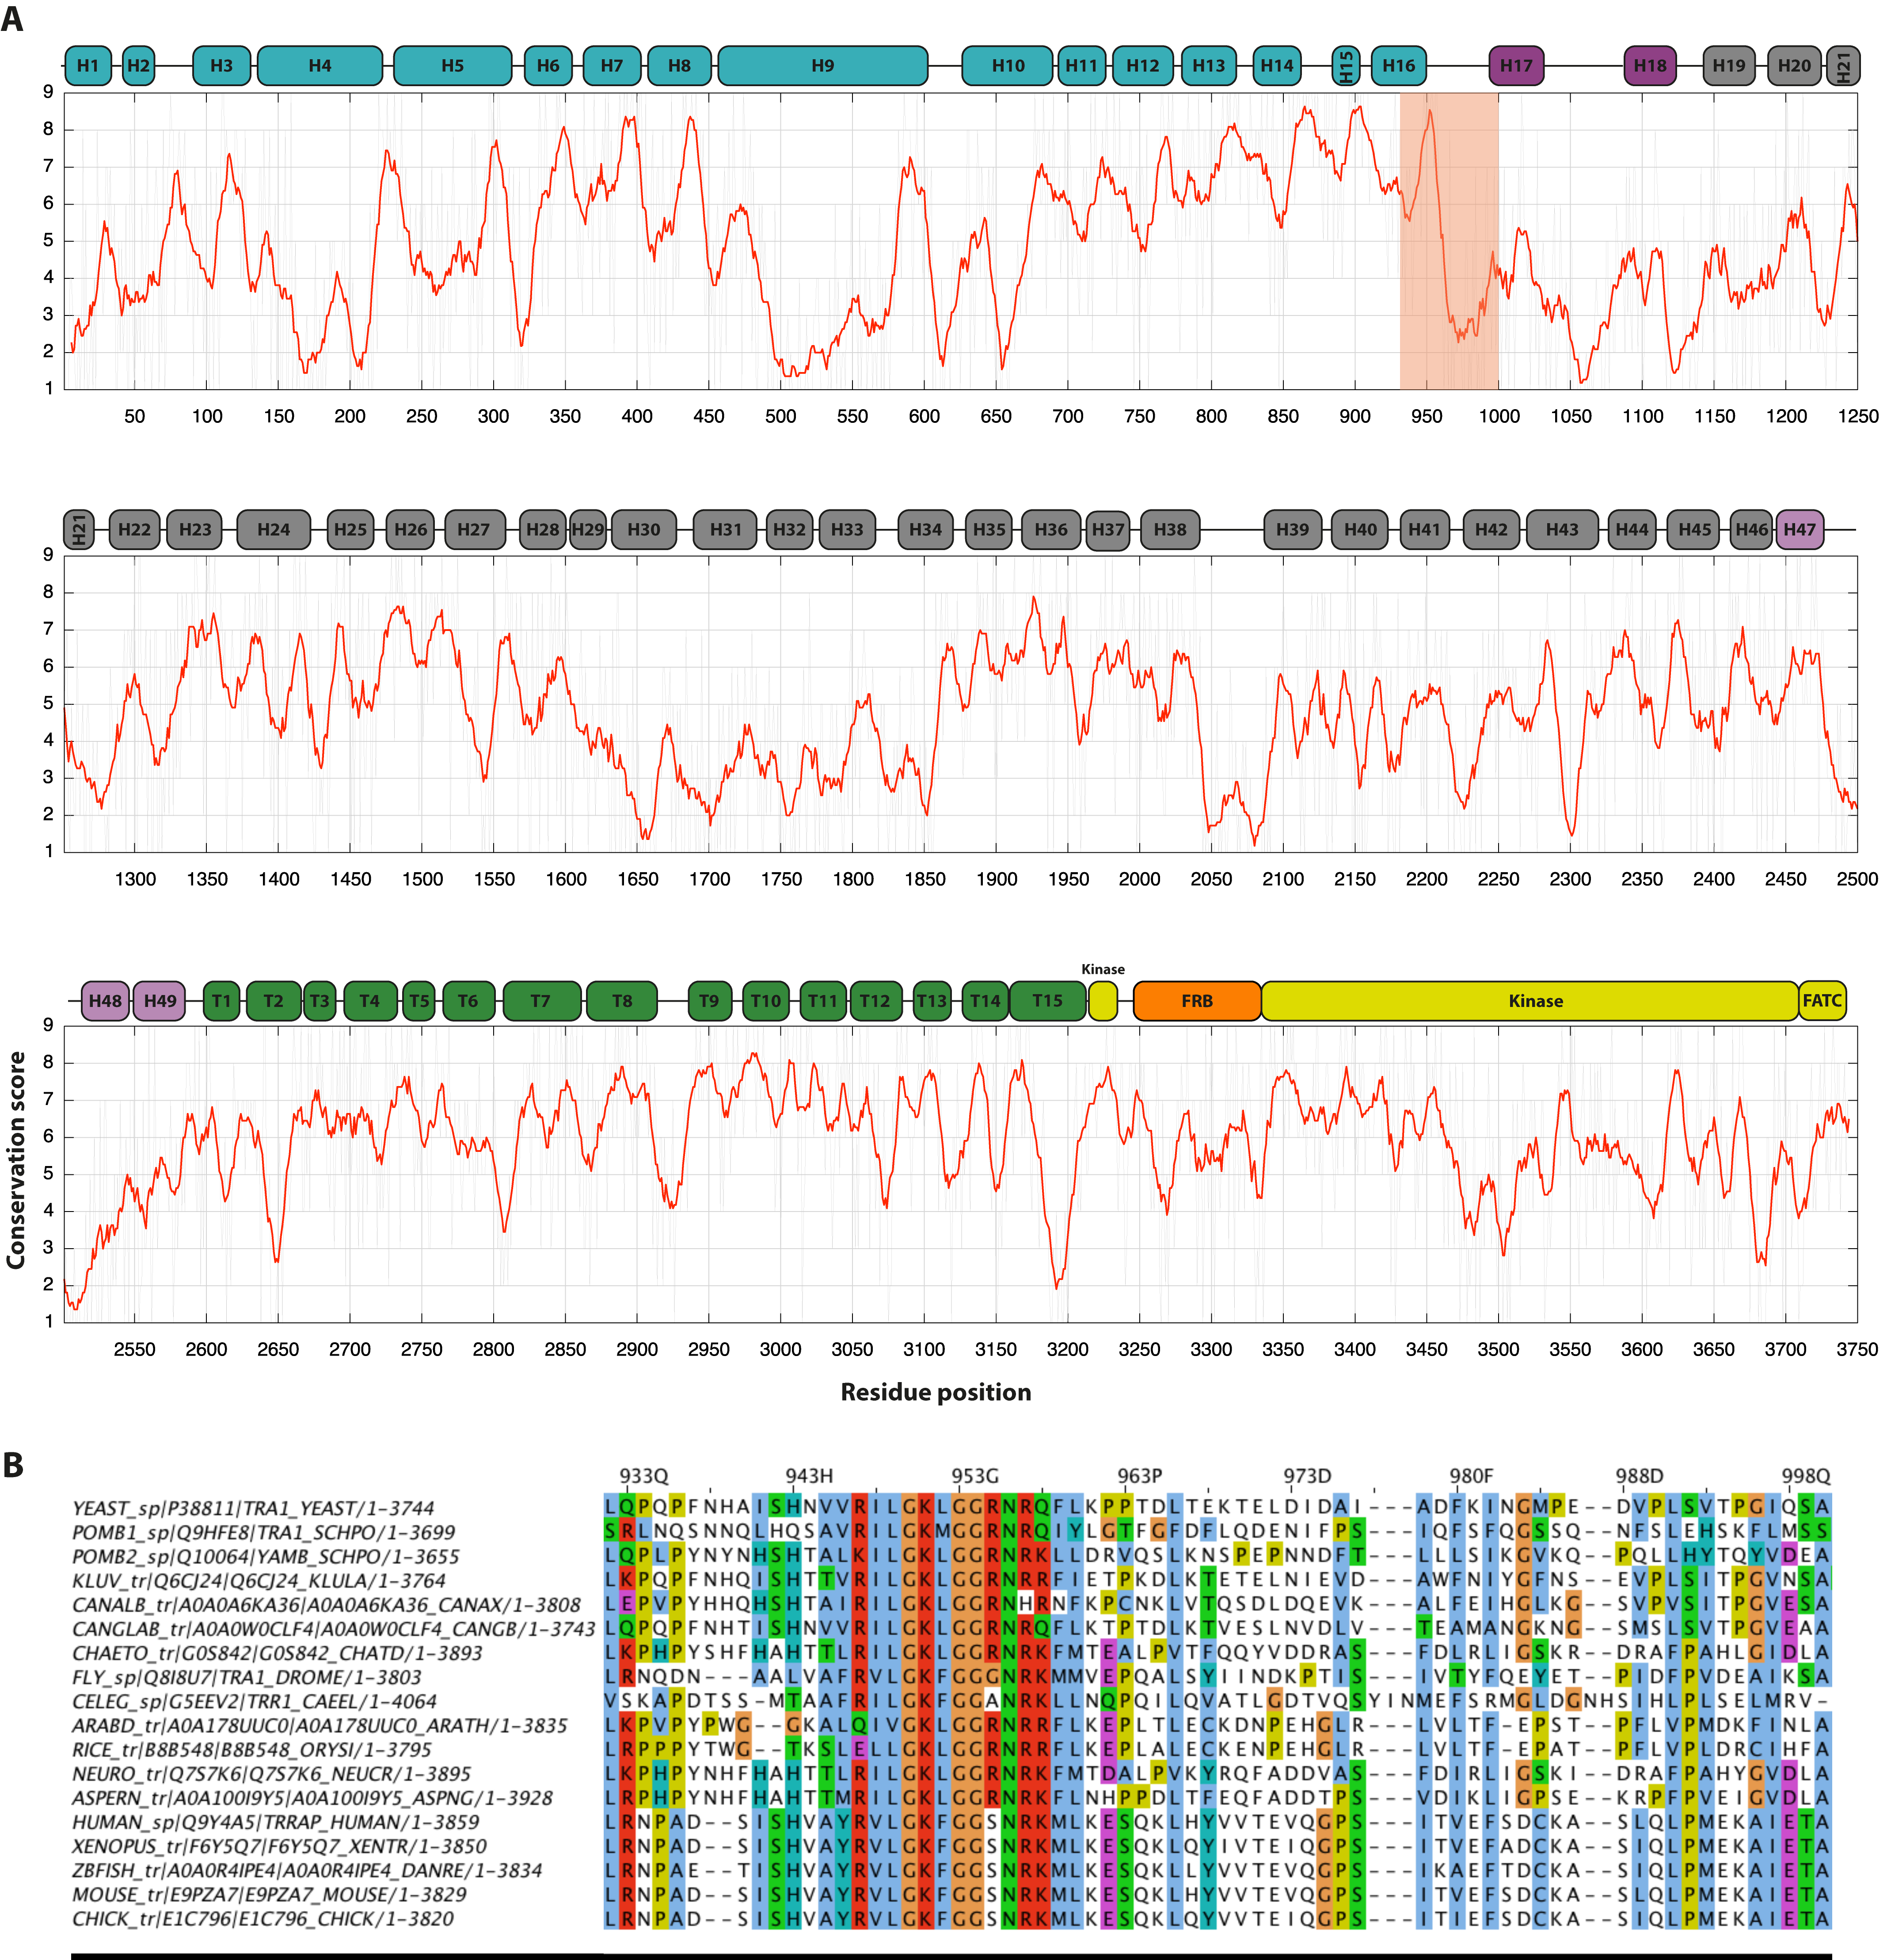

Supplement: supp [file elife-28384-supp-v1.zip › elife_poa_e28384_Figure_1_figure_supplement_1.png]

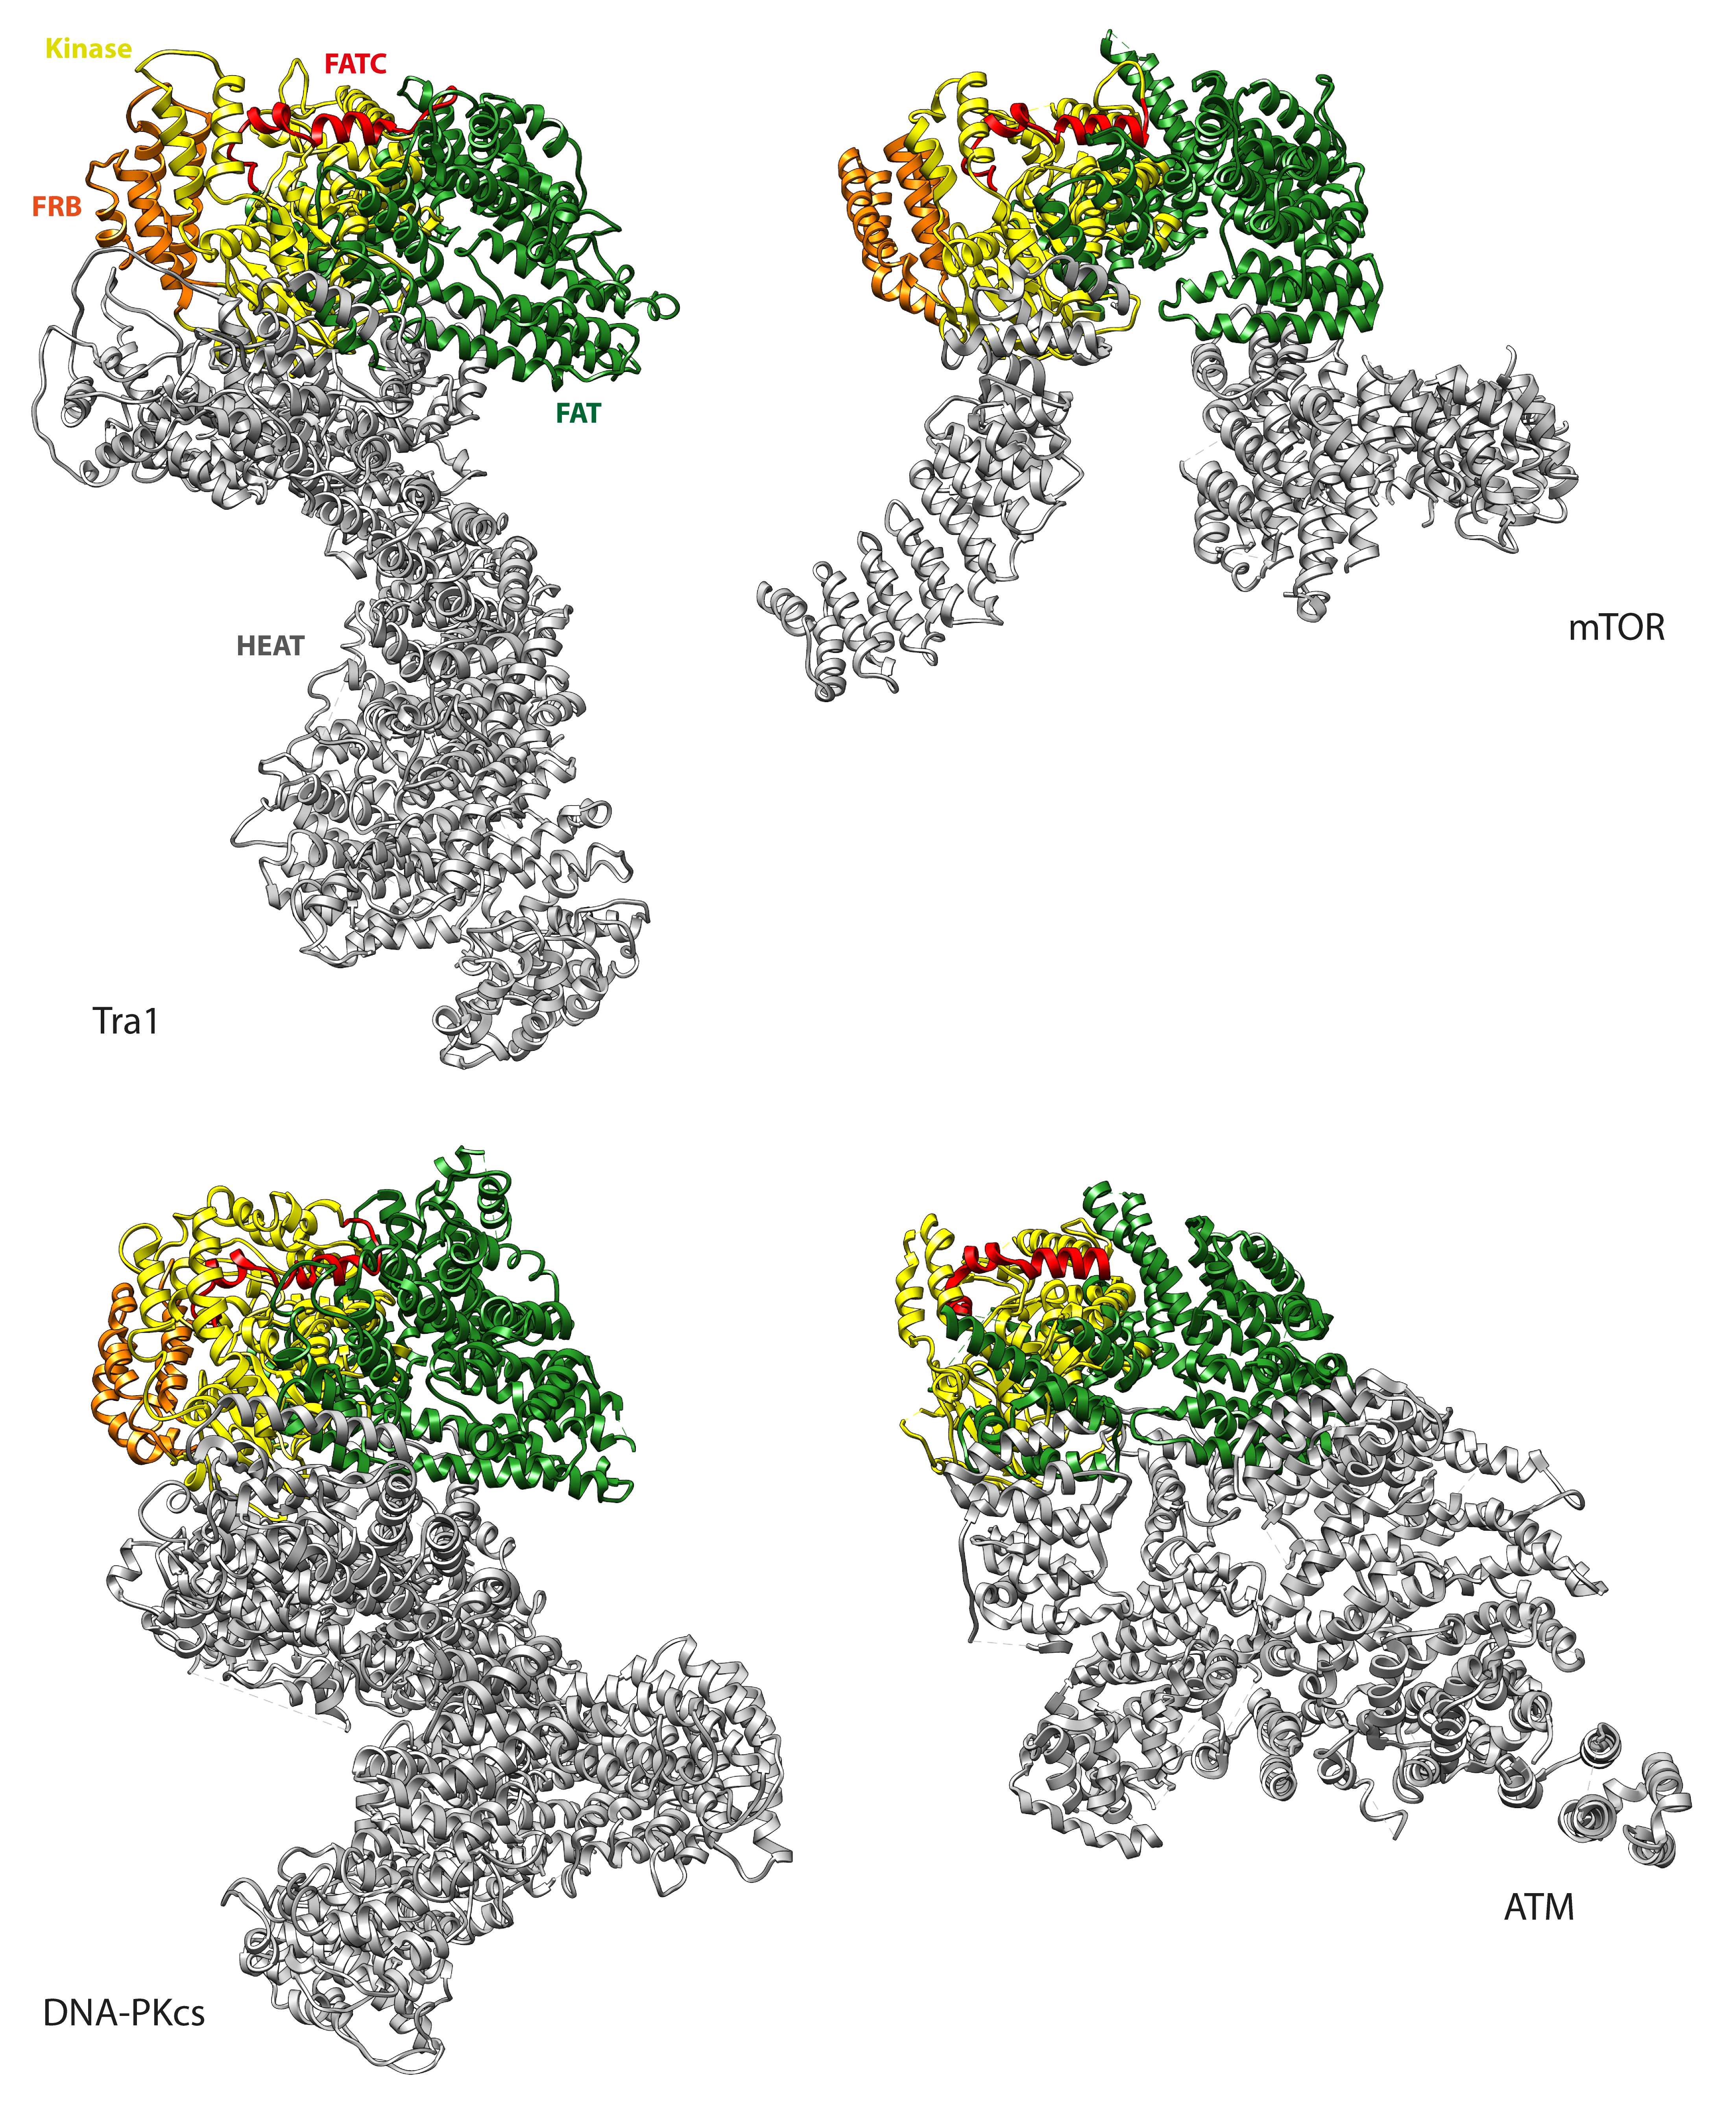

Supplement: supp [file elife-28384-supp-v1.zip › elife_poa_e28384_Figure_5_figure_supplement_5.png]

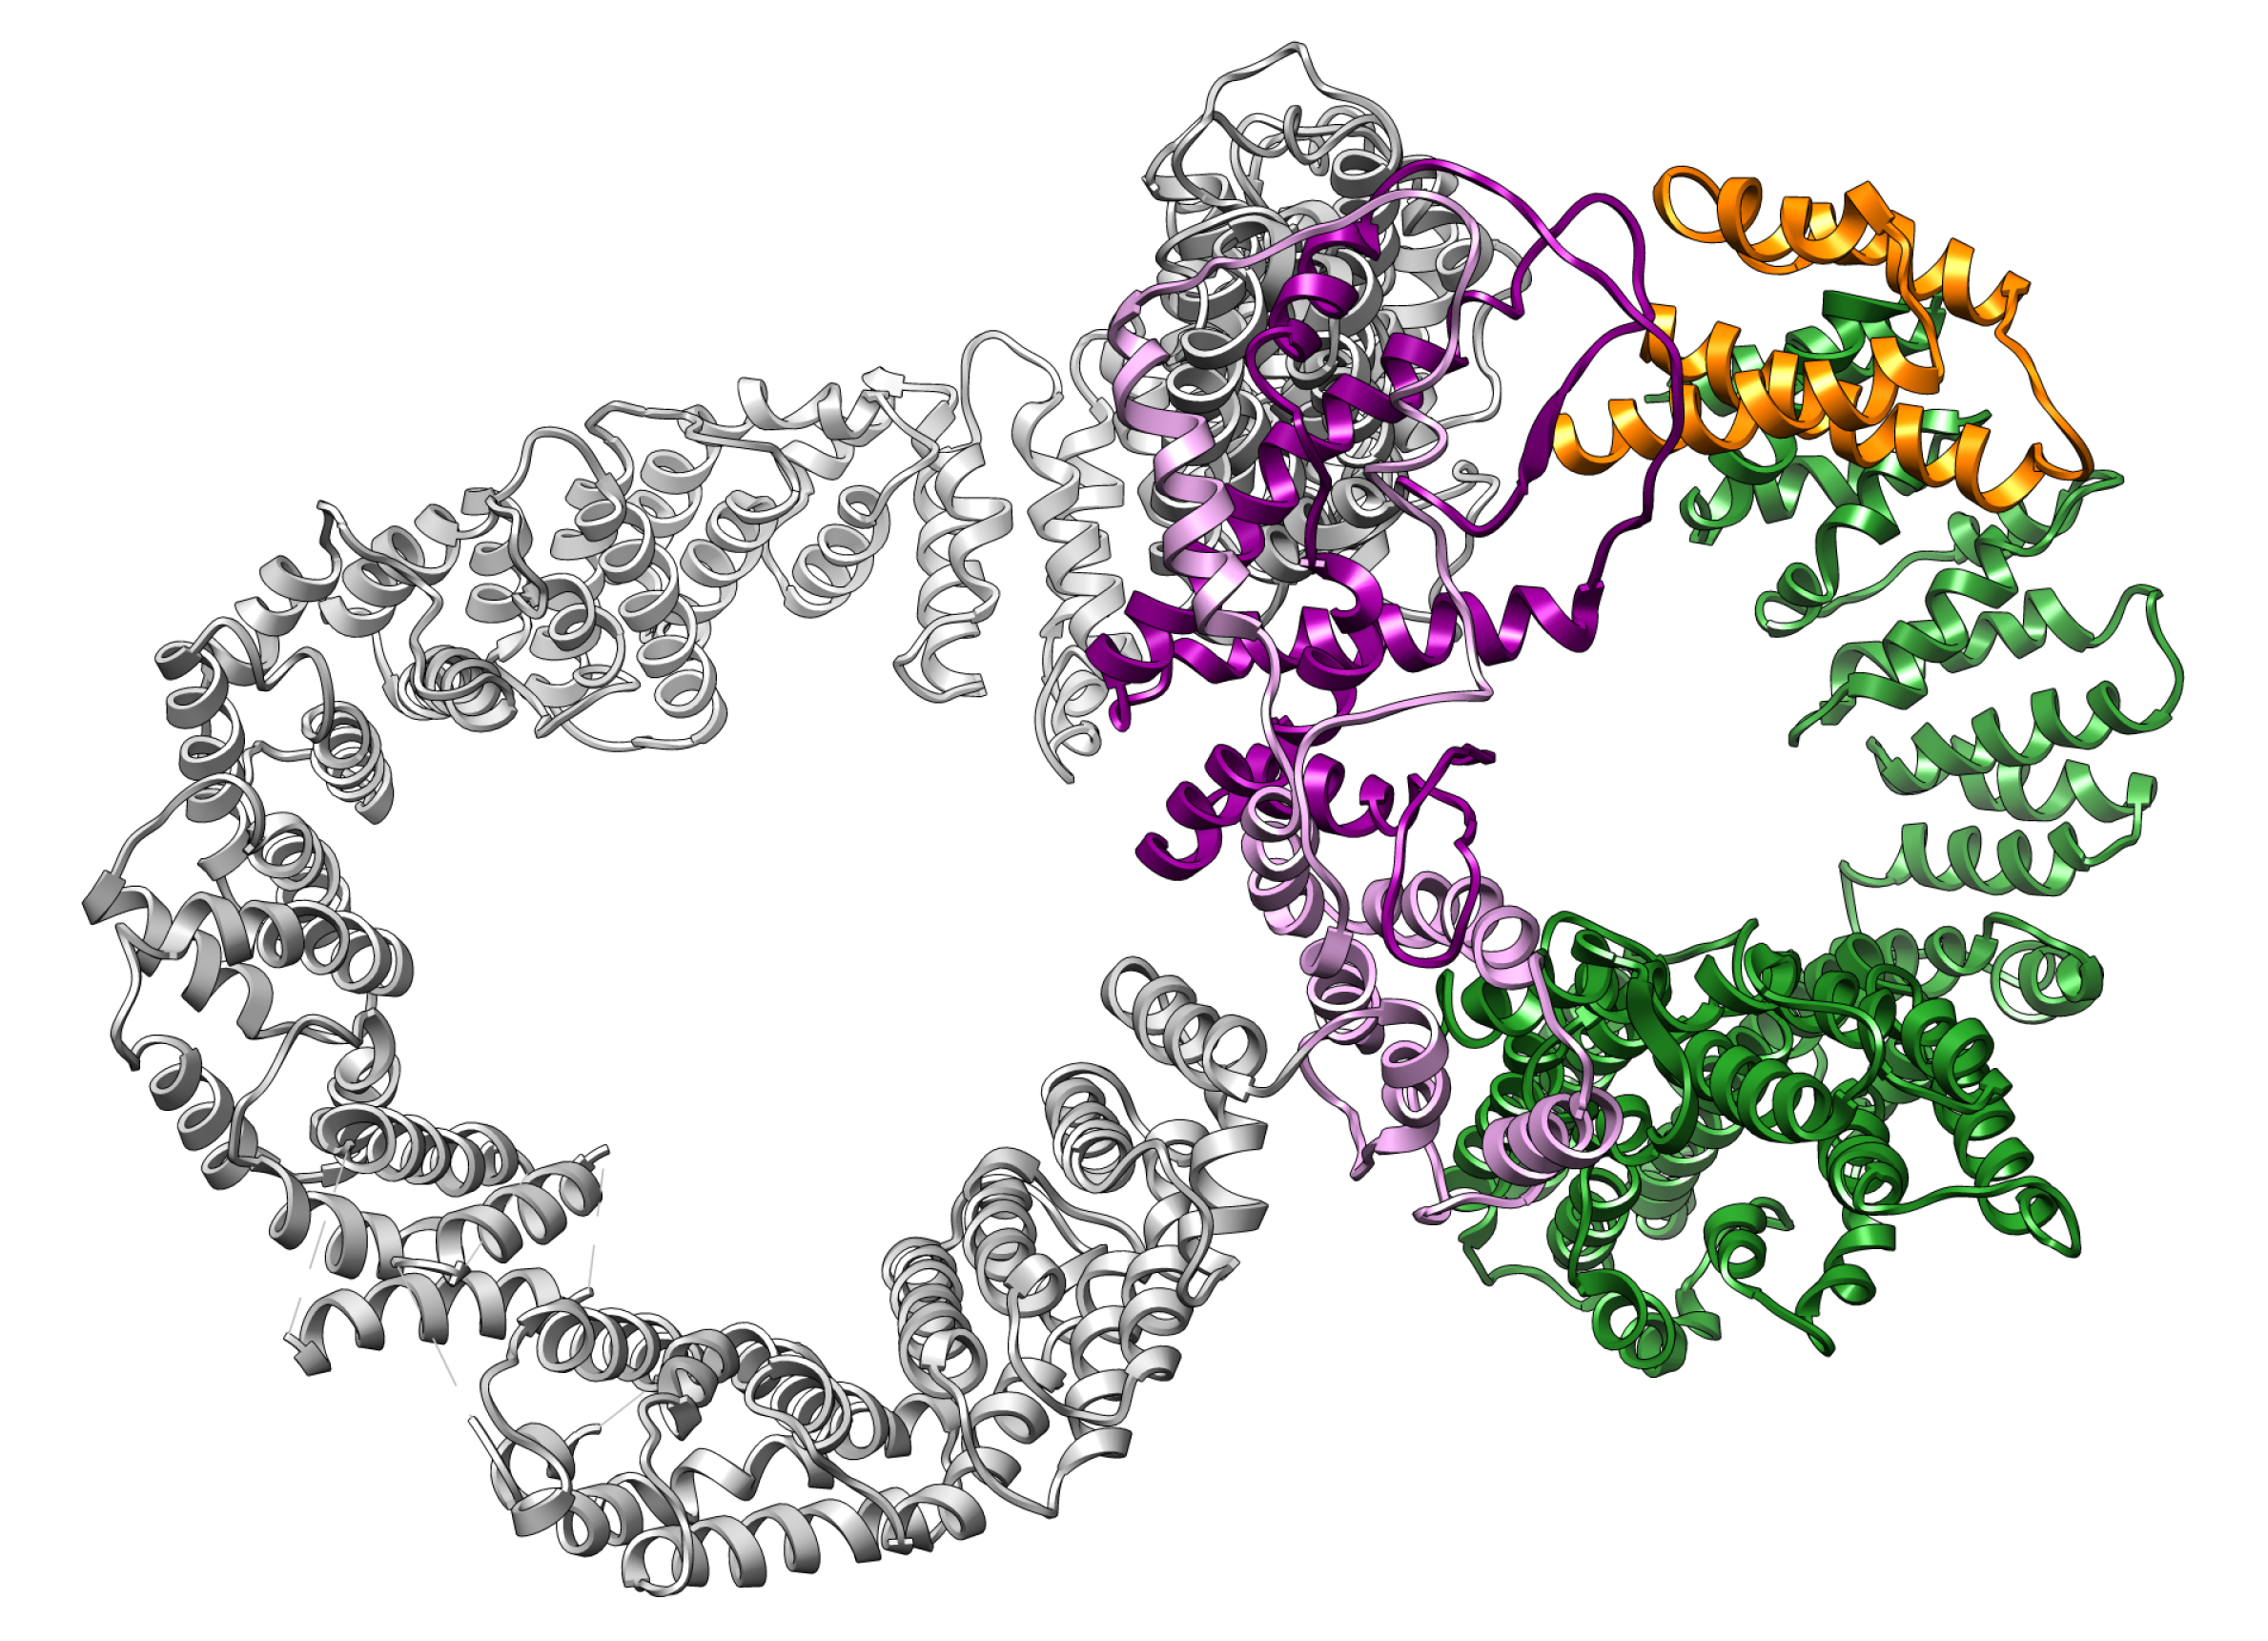

Supplement: supp [file elife-28384-supp-v1.zip › elife_poa_e28384_Figure_2_figure_supplement_1.png]

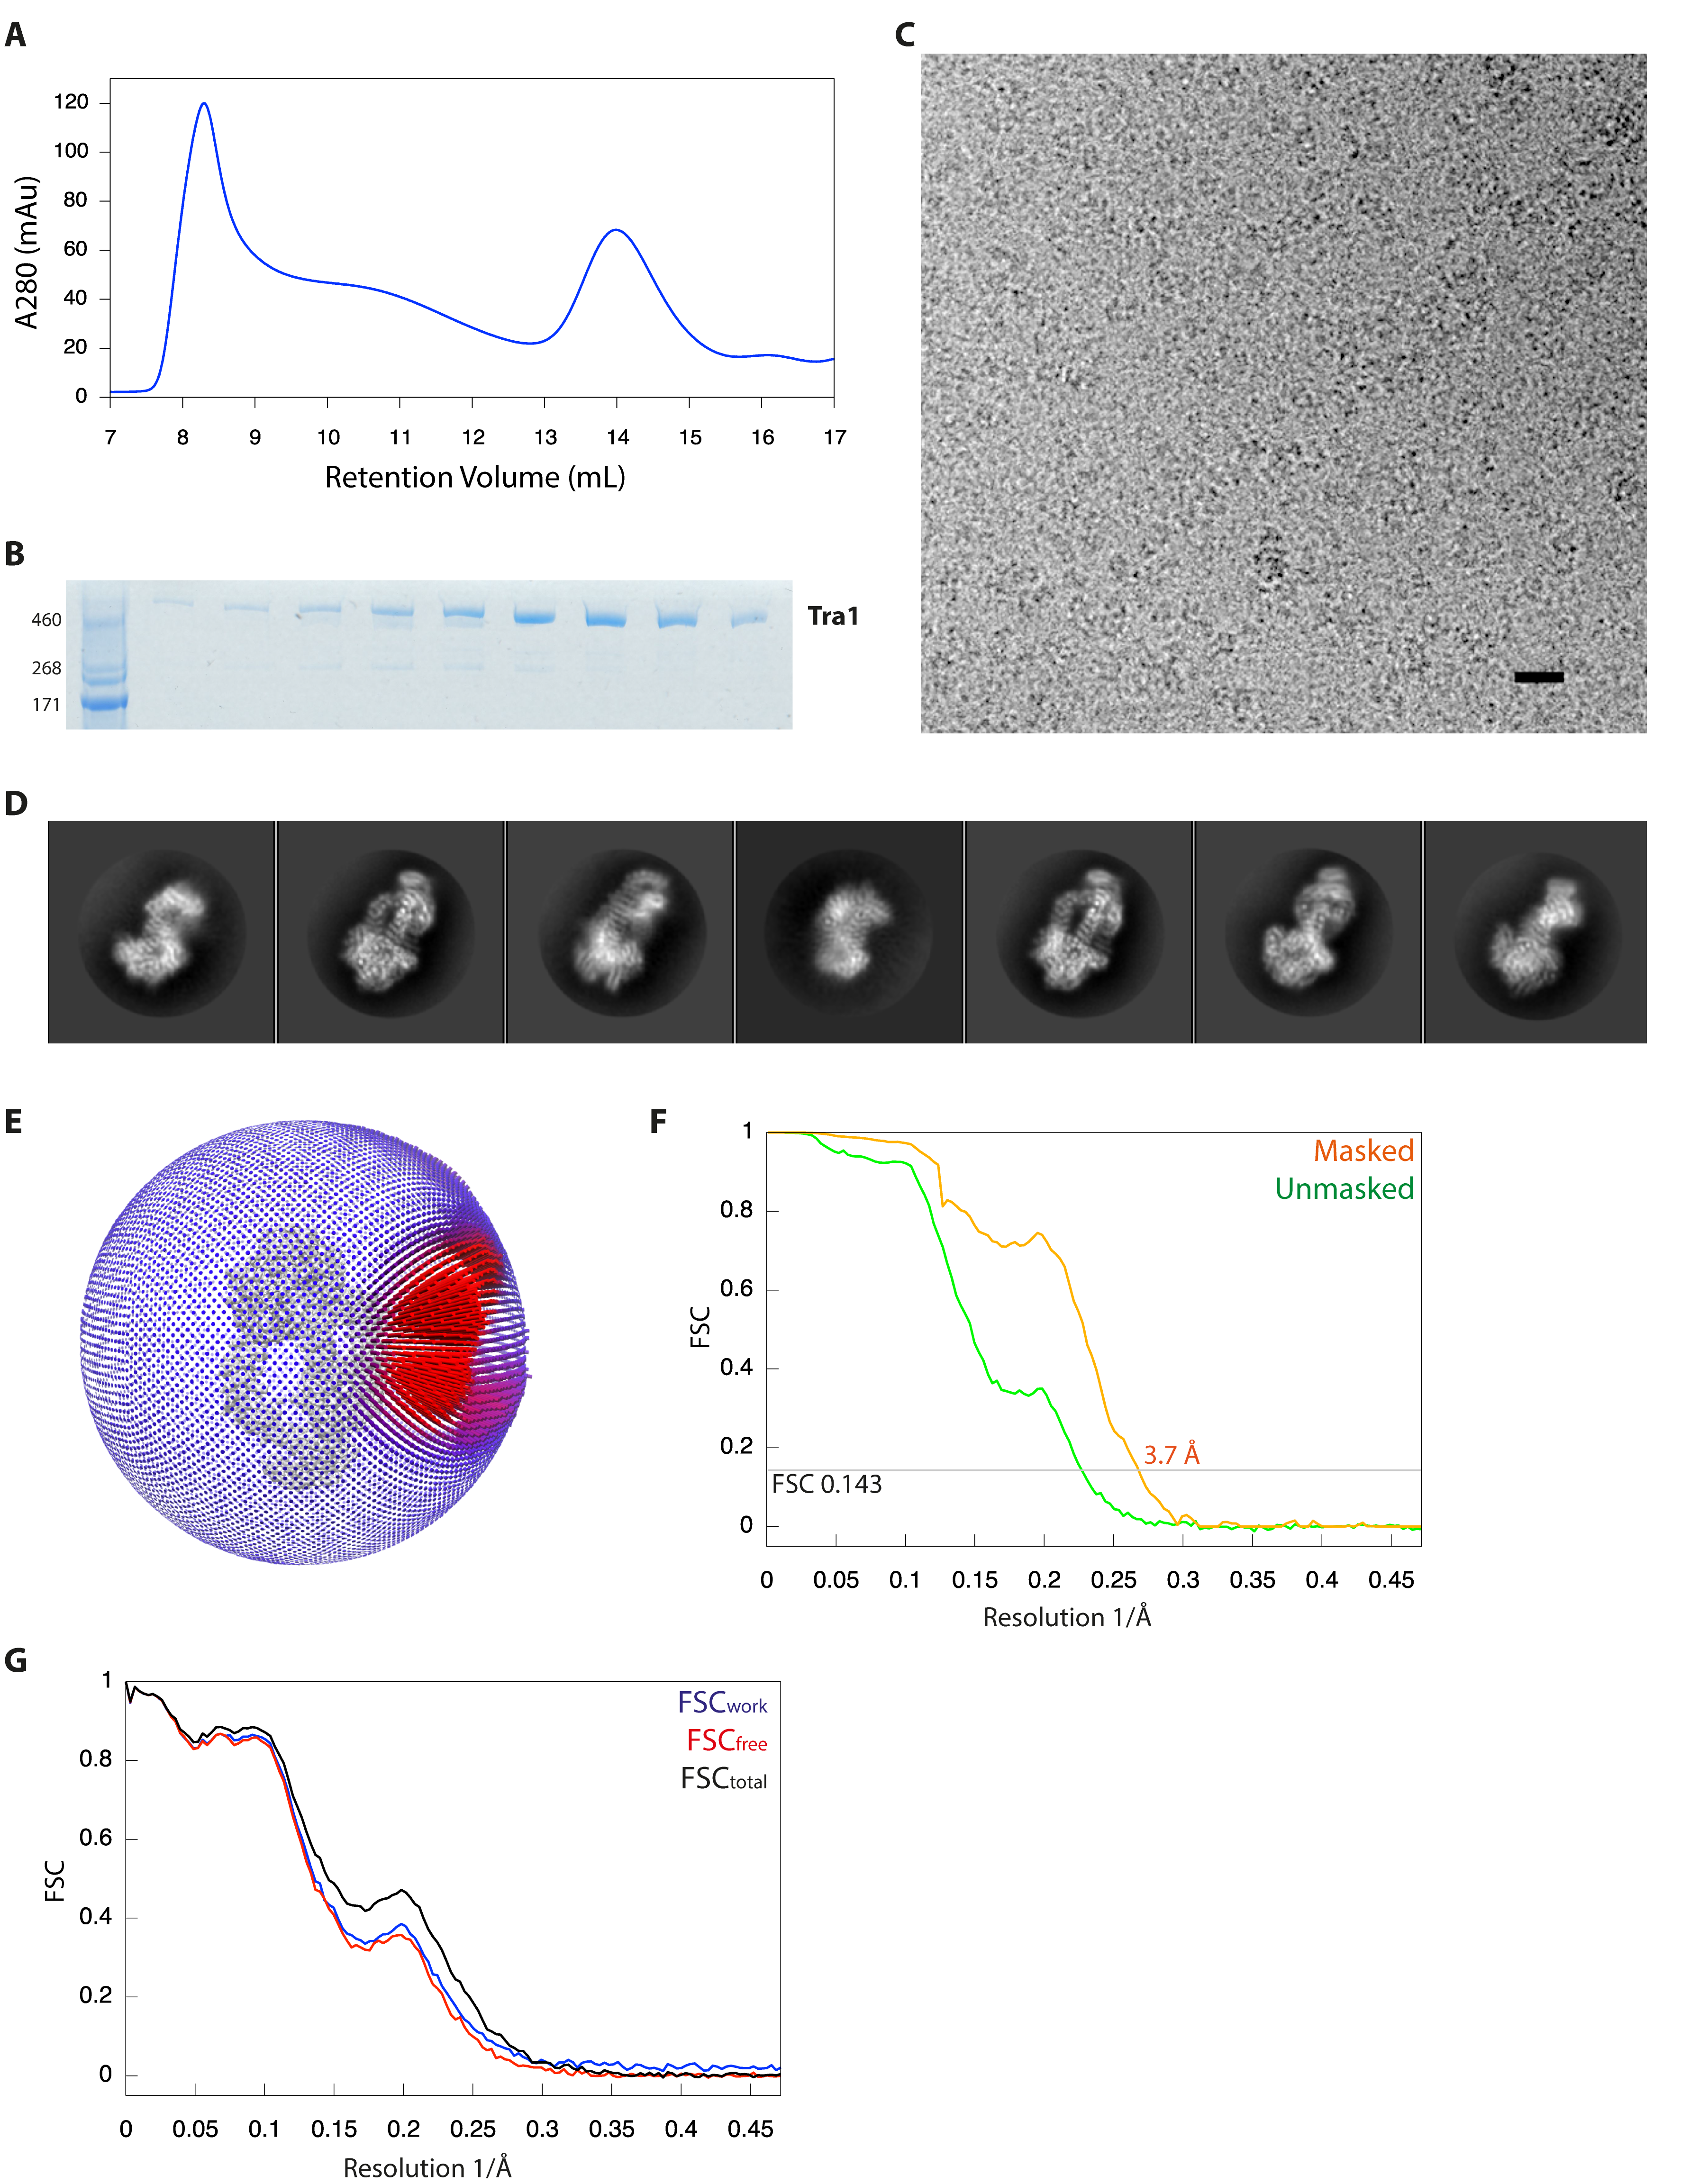

Supplement: supp [file elife-28384-supp-v1.zip › elife_poa_e28384_Figure_1_figure_supplement_3.png]

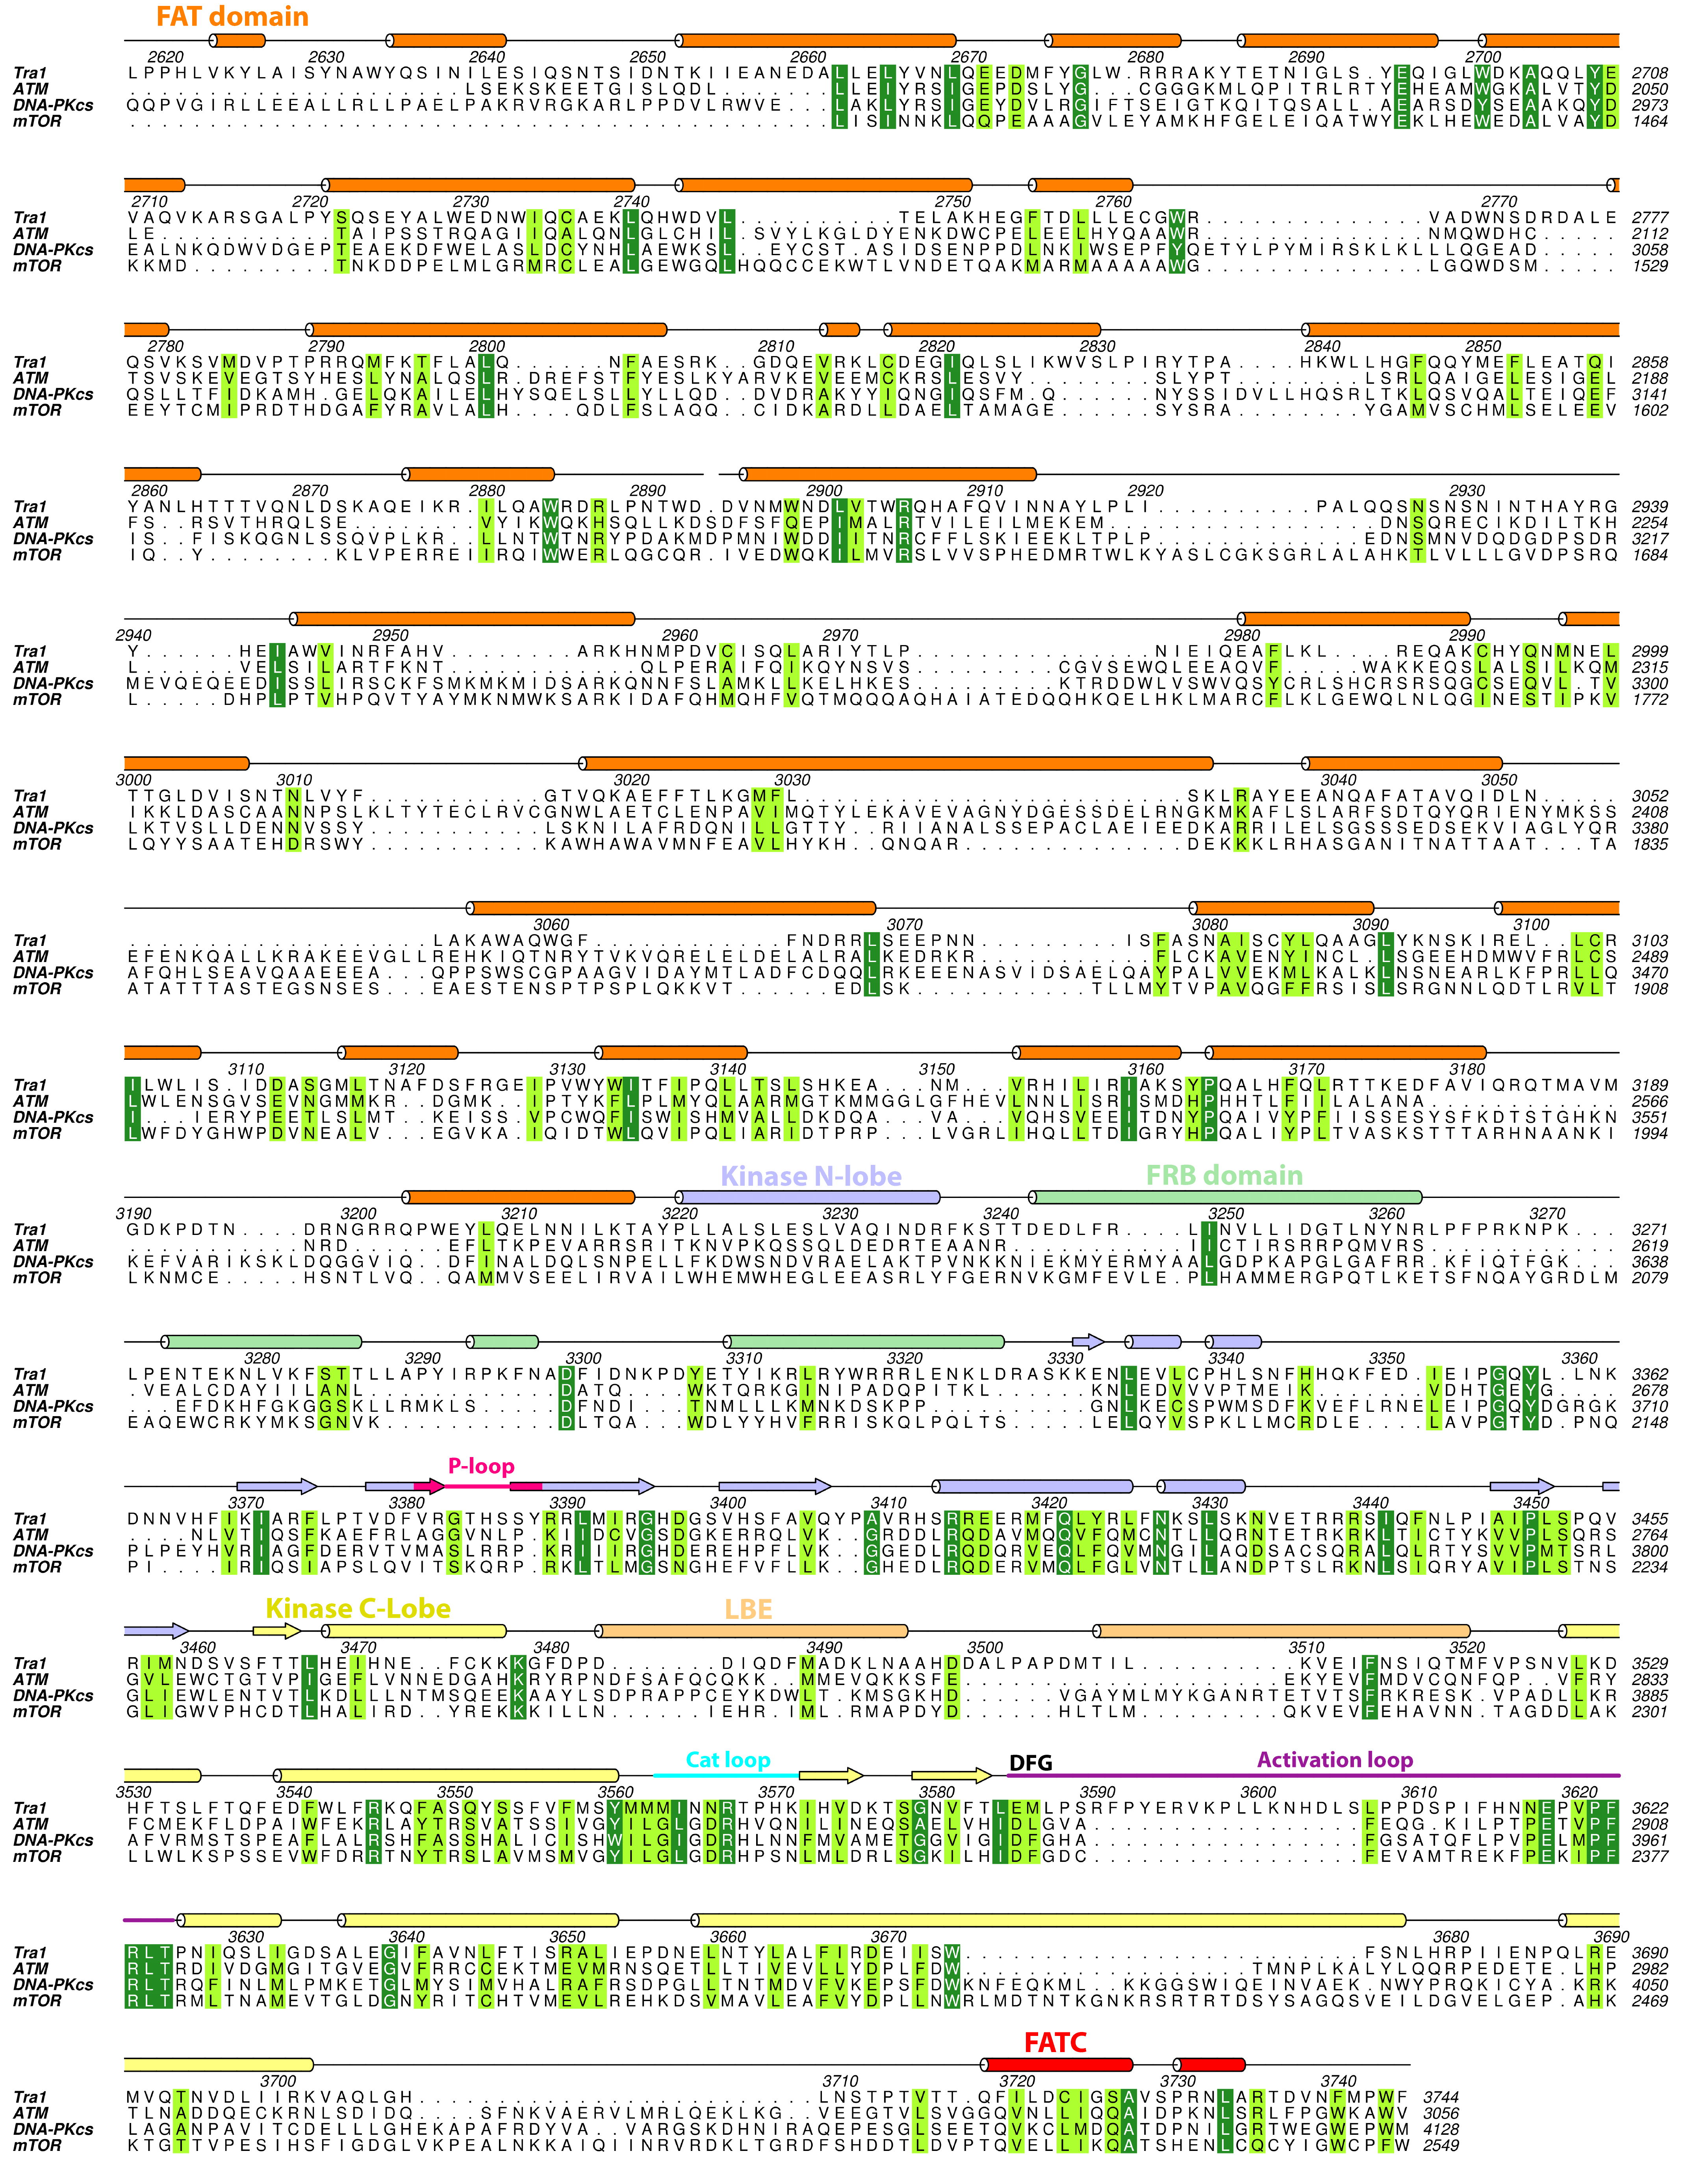

Supplement: supp [file elife-28384-supp-v1.zip › elife_poa_e28384_Figure_1_figure_supplement_2.png]
